# Supplementary material for: Metagenomic biodiversity assessment within an offshore wind farm
Source: Springer Nature journal article supplement (doi:10.1038/s41598-025-01541-x), 2025-05-14
Supplement: MOESM1 [file 41598_2025_1541_MOESM1_ESM.pdf]

## **Supplementary materials for:**

### **Metagenomic Biodiversity Assessment of an Offshore Wind Farm**

*Phanu Theodore Serivichyaswat, Thijs Scholte, Tim Wilms, Liv Stranddorf, Tom van der Valk*

#### **This PDF includes:**

|           |   |
|-----------|---|
| Figure S1 | 2 |
| Figure S2 | 3 |
| Figure S3 | 4 |
| Figure S4 | 5 |
| Figure S5 | 6 |

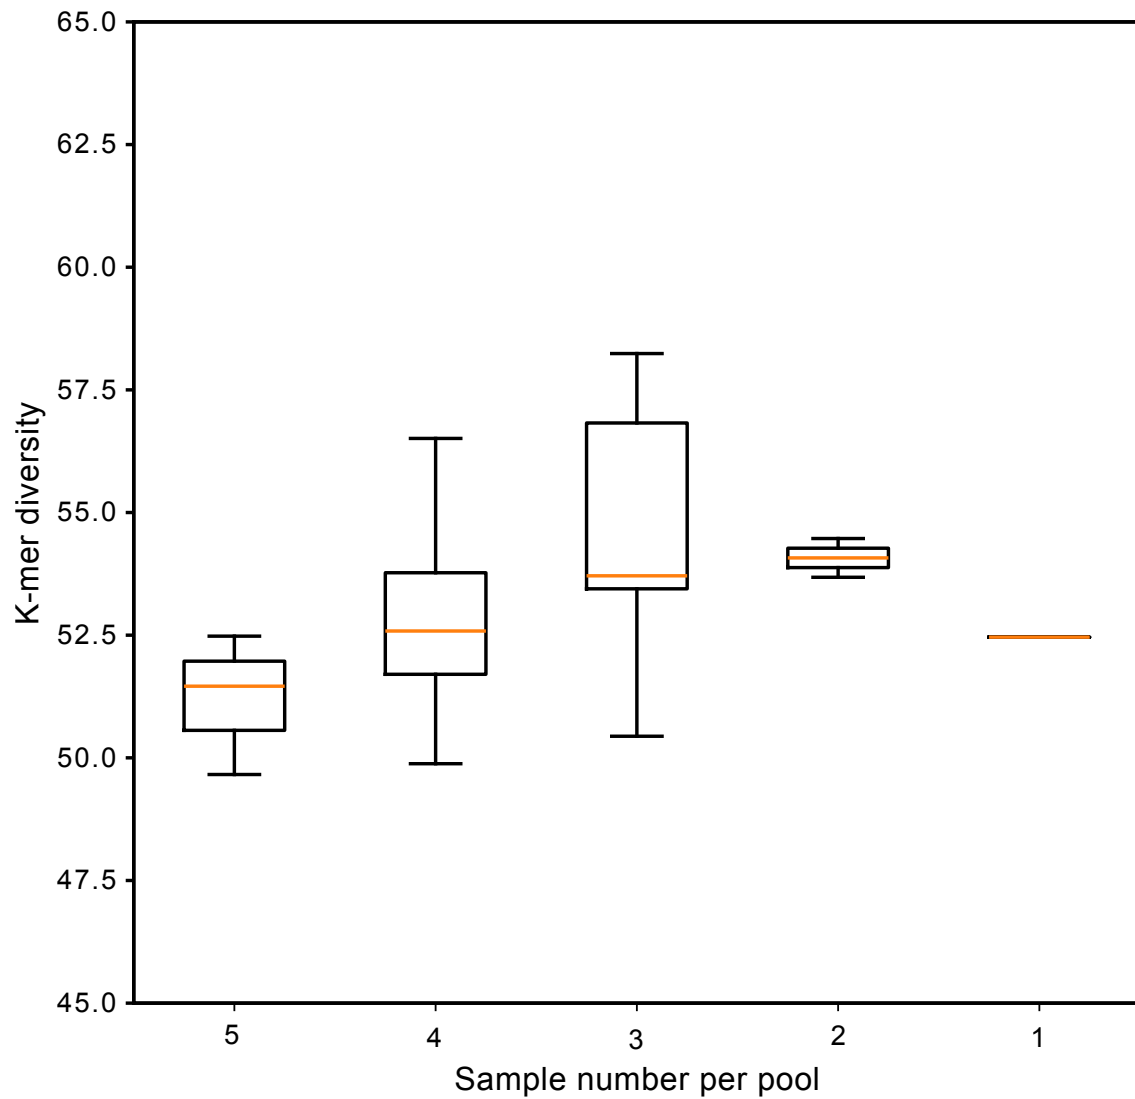

**Fig. S1.** Effect of sample number per pool on diversity metrics. No significant differences were observed between pools containing different numbers of input seawater samples (values represent mean  $\pm$  SD; Student's *t*-test).

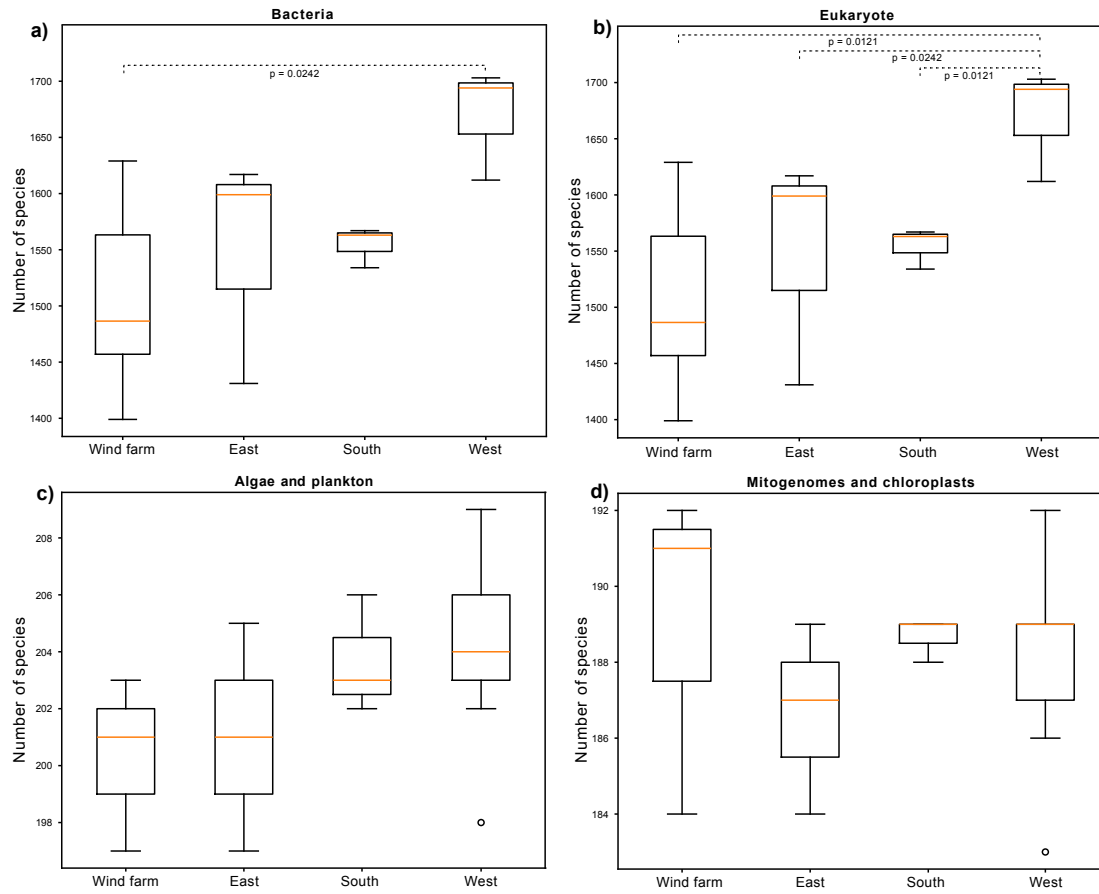

**Fig. S2.** Number of species detected (after quality filtering), grouped by bacteria (a), eukaryote (b), algae and plankton (c), and mitochondria (d) datasets (values represent mean  $\pm$  SD; Student's *t*-test).

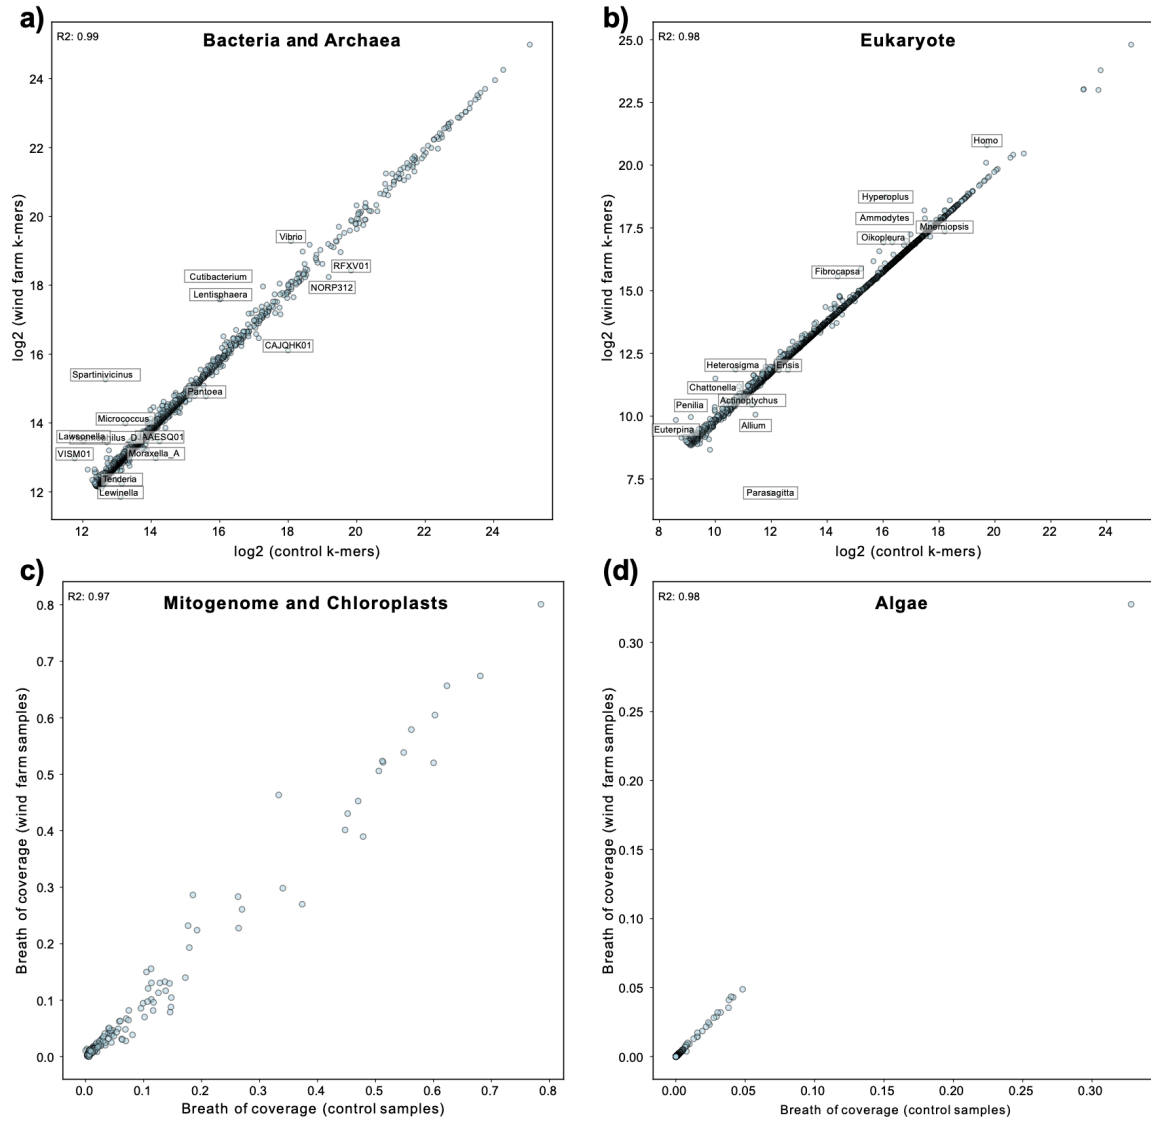

**Fig. S3. Correlation of DNA abundance between control and wind farm samples for all detected species.** The x-axis shows the number of identified kmers for a species, summed over all control samples and normalized for read numbers. The y-axis shows the corresponding k-mer counts in wind farm samples, also normalized. Each point represents a species, grouped into Bacteria/Archaea (a), Eukaryotes (b), mitochondrial genomes (c), and algal genomes (d). Species with significantly different abundances between control and wind farm samples are labelled.

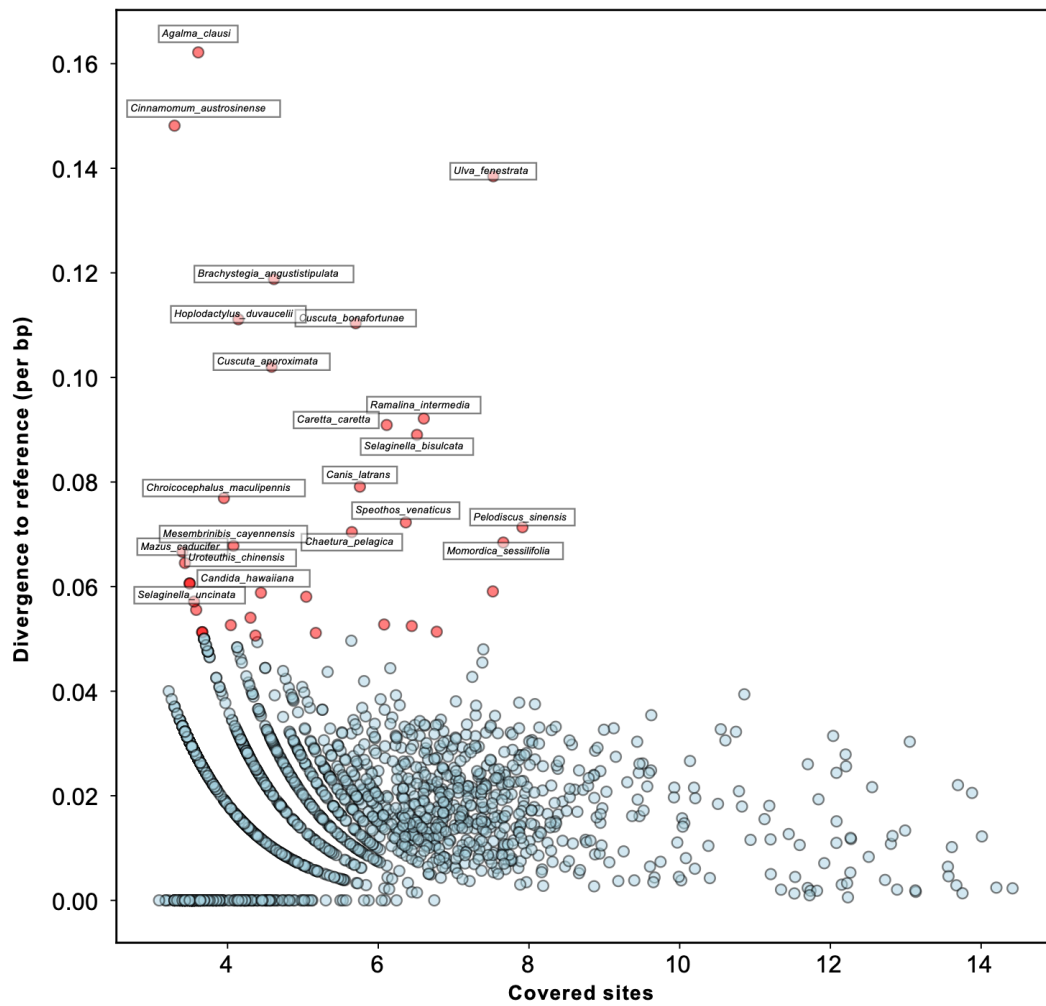

**Fig. S4.** Sequence divergence of each species relative to the reference genomes, based on alignments against the mitochondrial and chloroplast reference databases. Species exhibiting greater than 5% divergence were considered likely false positives and excluded from downstream analyses.

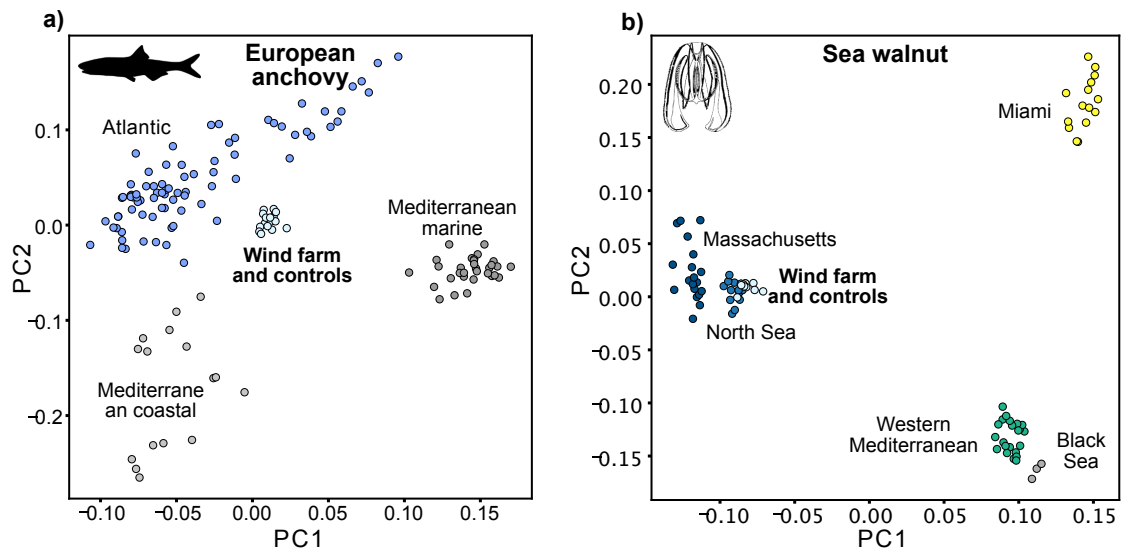

**Fig. S5.** Principal component analysis (PCA) comparing eDNA sequences of (a) European anchovy and (b) sea walnut to previously sequenced genomes.
